# Supplementary material for: Role of Gut Microbe Composition in Psychosocial Symptom Response to Exercise Training in Breast Cancer Survivors (ROME) study: protocol for a randomised controlled trial
Source: PubMed Central journal article supplement — BMJ Open. 2024 May 3;14(5):e081660. doi: 10.1136/bmjopen-2023-081660 (PMC11086582; doi:10.1136/bmjopen-2023-081660), 2024-05-03
Supplement: bmjopen-2023-081660.reviewer_comments.pdf [file bmjopen-2023-081660.reviewer_comments.pdf]

## PEER REVIEW HISTORY

BMJ Open publishes all reviews undertaken for accepted manuscripts. Reviewers are asked to complete a checklist review form (<http://bmjopen.bmj.com/site/about/resources/checklist.pdf>) and are provided with free text boxes to elaborate on their assessment. These free text comments are reproduced below.

## ARTICLE DETAILS

|                            |                                                                                                                                                                                 |
|----------------------------|---------------------------------------------------------------------------------------------------------------------------------------------------------------------------------|
| <b>TITLE (PROVISIONAL)</b> | Role of Gut Microbe Composition in Psychosocial Symptom Response to Exercise Training in Breast Cancer Survivors (ROME) Study - protocol for a randomized controlled trial      |
| <b>AUTHORS</b>             | Little, Rebecca; Carter, Stephen J.; Motl, Robert; Hunter, Gary; Cook, Abby; Liu, Nianjun; Krontiras, Helen; Lefkowitz, Elliot; Turan, Bulent; Schleicher, Erica; Rogers, Laura |

This article was not externally reviewed at BMJ Open. Protocols that have been independently assessed prior to submission to BMJ Open are usually fast-tracked to publication on the grounds that further substantial changes will not be possible. This independent assessment will usually be external, independent review for both a substantial grant award from a non-commercial or government funder and ethics approval.
